# Supplementary material
Source: publisher figshare collection journal article supplement (https://sage.figshare.com/ndownloader/files/17797529)

## Appendix 1

Supplemental Table 1: List of Manually Added Articles in Order of Year of Publication

| No. | Author(s)                          | Year | Title                                                                                      | Reason for Manual Addition     |
|-----|------------------------------------|------|--------------------------------------------------------------------------------------------|--------------------------------|
| 1   | Malthus, T.                        | 1798 | Essay on the principle of population                                                       | Not available in SSCI          |
| 2   | Hotelling, H.                      | 1931 | The economics of exhaustible resources                                                     | Not matching the keywords      |
| 3   | Carson, R.                         | 1962 | A Silent spring                                                                            | Not available in SSCI          |
| 4   | Ehrlich, P. R.                     | 1968 | Population bomb                                                                            | Not available in SSCI          |
| 5   | Ehrlich, P. R. & Holdren, J. P.    | 1971 | Impact of population growth                                                                | Not matching the keywords      |
| 6   | Meadows, D. et al.                 | 1972 | The limits to growth                                                                       | Not available in SSCI          |
| 7   | Dasgupta, P. & Heal, G.            | 1974 | The optimal depletion of exhaustible resources                                             | Not available in SSCI          |
| 8   | Stiglitz, J.                       | 1974 | Growth with exhaustible natural resources - efficient and optimal growth paths             | Not matching the keywords      |
| 9   | Georgescu-Roegen, N.               | 1975 | Energy and economic myths                                                                  | Not matching the keywords      |
| 10  | Georgescu-Roegen, N.               | 1977 | Steady-state and ecological salvation - thermodynamic analysis                             | Not matching the keywords      |
| 11  | De Long, J.B. & Summers, L. H.     | 1991 | Equipment investment and economic growth                                                   | Not matching the keywords      |
| 12  | Persson, T. & Tabellini, G.        | 1994 | Is inequality harmful for growth                                                           | Not matching the keywords      |
| 13  | Max-Neef, M.                       | 1995 | Economic growth and quality of life: a threshold hypothesis                                | Not matching the keywords      |
| 14  | Bovenberg, A. L. & Smulders, S. A. | 1996 | Transitional impacts of environmental policy in an endogenous growth model                 | Not matching the keywords      |
| 15  | Elbasha, E. H. & Roe, T. L.        | 1996 | On endogenous growth: the implications of environmental externalities                      | Not matching the keywords      |
| 16  | Smulders, S. & Gradus, R.          | 1996 | Pollution abatement and long-term growth                                                   | Not available in SSCI          |
| 17  | Stokey, N.                         | 1998 | Are there limits to growth?                                                                | Not captured in initial search |
| 18  | Hamilton, C.                       | 2003 | Growth fetish                                                                              | Not available in SSCI          |
| 19  | Røpke, I.                          | 2005 | Trends in the development of ecological economics from the late 1980's to the early 2000's | Not matching the keywords      |
| 20  | Fournier, V.                       | 2008 | Escaping from the economy: the politics of degrowth                                        | Not available in SSCI          |
| 21  | Polimeni, J. M.                    | 2008 | The Jevon's Paradox and the myth of resource efficiency improvements                       | Not available in SSCI          |
| 22  | Jackson, T.                        | 2009 | Prosperity without growth: economics for a finite planet                                   | Not available in SSCI          |
| 23  | Kallis, G. et al.                  | 2009 | Paper assets, real debts: an ecological-economic exploration of the global economic crisis | Not available in SSCI          |
| 24  | Latouche, S.                       | 2009 | Farewell to growth                                                                         | Not available in SSCI          |
| 25  | Rockstrom, J. et al.               | 2009 | A safe operating space for humanity                                                        | Not matching the keywords      |
| 26  | Cattaneo, C. & Gavalda, M.         | 2010 | The experience of rurban squats in Collserola, Barcelona: what kind of degrowth?           | Not captured in initial search |
| 27  | Hueting, R.                        | 2010 | Why environmental sustainability can most probably not be attained with growing production | Not matching the keywords      |
| 28  | Latouche, S.                       | 2010 | Special issue: growth, recession, or degrowth for sustainability and equity?               | Not captured in initial search |
| 29  | Matthey, A.                        | 2010 | Less is more: the influence of aspirations and priming on well-being                       | Not matching the keywords      |

| No. | Author(s)                  | Year | Title                                                                                    | Reason for Manual Addition     |
|-----|----------------------------|------|------------------------------------------------------------------------------------------|--------------------------------|
| 30  | Schneider, F. et al.       | 2010 | Crisis or opportunity? Economic degrowth for social equity and ecological sustainability | Not available in SSCI          |
| 31  | Smith, R.                  | 2010 | Beyond growth or beyond capitalism?                                                      | Not available in SSCI          |
| 32  | van den Bergh, J. C. J. M. | 2010 | Relax about GDP growth: implications for climate and crisis policies                     | Not available in SSCI          |
| 33  | Victor, P.                 | 2010 | Questioning economic growth                                                              | Not matching the keywords      |
| 34  | Cattaneo, C. et al.        | 2012 | Degrowth futures and democracy introduction                                              | Not captured in initial search |
| 35  | Martínez-Alier, J.         | 2012 | Environmental justice and economic degrowth: an alliance between two movements           | Not available in SSCI          |
| 36  | Boulding, K.               | 2013 | Key text: the economics of the coming spaceship earth                                    | Not matching the keywords      |
| 37  | Demaria, F. et al.         | 2013 | What is degrowth? From an activist slogan to a social movement                           | Not captured in initial search |
| 38  | Dietz, R. & O'Neill, D.    | 2013 | Enough is enough: building a sustainable economy in a world of finite resources          | Not available in SSCI          |
| 39  | Muraca, B.                 | 2013 | Décroissance: a project for a radical transformation of society                          | Not matching the keywords      |

## Appendix 2

Supplemental Table 2: List of the 57 Most Highly Cited Publications in the Collection

| No. | HistCite ID | Author(s)                                                        | Title                                                                                               | Publication                                          | Year | LCS | Theme                                      |
|-----|-------------|------------------------------------------------------------------|-----------------------------------------------------------------------------------------------------|------------------------------------------------------|------|-----|--------------------------------------------|
| 1   | 10          | Meadows, D.                                                      | The Limits to Growth                                                                                | Book                                                 | 1972 | 98  | Historical Development of Growth Economics |
| 2   | 425         | Jackson, T.                                                      | Prosperity without growth: economics for a finite planet                                            | Book                                                 | 2009 | 83  | Growth and Degrowth Economics              |
| 3   | 494         | Schneider, F.<br>Kallis, G.<br>Martínez-Alier, J.                | Crisis or opportunity? Economic degrowth for social equity and ecological sustainability            | Journal of Cleaner Production                        | 2010 | 50  | Growth and Degrowth Economics              |
| 4   | 575         | Kallis, G.                                                       | In defence of degrowth                                                                              | Ecological Economics                                 | 2011 | 47  | Growth and Degrowth Economics              |
| 5   | 528         | Martínez-Alier, J.<br>Pascual, U.<br>Vivien, F. D.<br>Zaccai, E. | Sustainable de-growth: mapping the context, criticisms and future prospects of an emergent paradigm | Ecological Economics                                 | 2010 | 41  | Growth and Degrowth Economics              |
| 6   | 576         | van den Bergh, J. C. J. M.                                       | Environment versus growth - a criticism of degrowth" and a plea for "a-growth"                      | Ecological Economics                                 | 2011 | 31  | Growth and Degrowth Economics              |
| 7   | 469         | Rockstrom, J. et al.                                             | A safe operating space for humanity                                                                 | Nature                                               | 2009 | 27  | Ecological Economics                       |
| 8   | 508         | Kerschner, C.                                                    | Economic de-growth vs. Steady-state economy                                                         | Journal of Cleaner Production                        | 2010 | 26  | Growth and Degrowth Economics              |
| 9   | 420         | Latouche, S.                                                     | Farewell to growth                                                                                  | Book                                                 | 2009 | 25  | Growth and Degrowth Economics              |
| 10  | 475         | Alier, J. M.                                                     | Socially sustainable economic de-growth                                                             | Development and Change                               | 2009 | 24  | Growth and Degrowth Economics              |
| 11  | 668         | Kallis, G.<br>Kerschner, C.<br>Martínez-Alier, J.                | The economics of degrowth                                                                           | Ecological Economics                                 | 2012 | 23  | Growth and Degrowth Economics              |
| 12  | 375         | Fournier, V.                                                     | Escaping from the economy: the politics of degrowth                                                 | International Journal of Sociology and Social Policy | 2008 | 21  | Political Economics                        |
| 13  | 505         | Latouche, S.                                                     | Special issue: growth, recession, or degrowth for sustainability and equity?                        | Journal of Cleaner Production                        | 2010 | 18  | Growth and Degrowth Economics              |
| 14  | 68          | Max-Neef, M.                                                     | Economic growth and quality of life: a threshold hypothesis                                         | Ecological Economics                                 | 1995 | 17  | 1990's Growth Economics                    |
| 15  | 133         | Stokey, N. L.                                                    | Are there limits to growth?                                                                         | International Economic Review                        | 1998 | 17  | 1990's Growth Economics                    |

| No. | HistCite ID | Author(s)                                                          | Title                                                                                    | Publication                                       | Year | LCS | Theme                                      |
|-----|-------------|--------------------------------------------------------------------|------------------------------------------------------------------------------------------|---------------------------------------------------|------|-----|--------------------------------------------|
| 16  | 1           | Malthus, T.                                                        | Essay on the principle of population                                                     | Book                                              | 1798 | 16  | Historical Development of Growth Economics |
| 17  | 2           | Hotelling, H.                                                      | The economics of exhaustible resources                                                   | Journal of Political Economy                      | 1931 | 15  | Historical Development of Growth Economics |
| 18  | 18          | Stiglitz, J.                                                       | Growth with exhaustible natural resources - efficient and optimal growth paths           | Review of Economic Studies                        | 1974 | 15  | Historical Development of Growth Economics |
| 19  | 509         | Spangenberg, J. H.                                                 | The growth discourse, growth policy and sustainable development: two thought experiments | Journal of Cleaner Production                     | 2010 | 15  | Growth and Degrowth Economics              |
| 20  | 546         | Victor, P.                                                         | Questioning economic growth                                                              | Nature                                            | 2010 | 15  | Ecological Economics                       |
| 21  | 712         | Demaria, F.<br>Schneider, F.<br>Sekulova, F.<br>Martínez-Alier, J. | What is degrowth? From an activist slogan to a social movement                           | Environmental Values                              | 2013 | 15  | Political Economics                        |
| 22  | 4           | Boulding, K. E.                                                    | The economics of the coming spaceship earth                                              | Environmental Quality Issues in A Growing Economy | 1966 | 14  | Historical Development of Growth Economics |
| 23  | 12          | Daly, H.E.                                                         | The economics of the steady state                                                        | American Economic Review                          | 1974 | 14  | Historical Development of Growth Economics |
| 24  | 54          | Persson, T.<br>Tabellini, G.                                       | Is inequality harmful for growth                                                         | American Economic Review                          | 1994 | 13  | 1990's Growth Economics                    |
| 25  | 376         | Polimeni, J. M.                                                    | The Jevon's Paradox and the myth of resource efficiency improvements                     | Book                                              | 2008 | 13  | Ecological Economics                       |
| 26  | 682         | Dietz, R.<br>O'Neill, D.                                           | Enough is Enough: building a sustainable economy in a world of finite resources          | Book                                              | 2013 | 13  | Growth and Degrowth Economics              |
| 27  | 59          | John, A.<br>Pecchenino, R.                                         | An overlapping generations model of growth and the environment                           | Economic Journal                                  | 1994 | 12  | 1990's Growth Economics                    |
| 28  | 335         | Baykan, B. G.                                                      | From limits to growth to degrowth within French green politics                           | Environmental Politics                            | 2007 | 12  | Political Economics                        |
| 29  | 511         | Cattaneo, C.<br>Gavalda, M.                                        | The experience of rurban squats in Collserola, Barcelona: what kind of degrowth?         | Journal of Cleaner Production                     | 2010 | 12  | Growth and Degrowth Economics              |
| 30  | 222         | Jones, C. I.                                                       | Sources of US economic growth in a world of ideas                                        | American Economic Review                          | 2002 | 11  | 1990's Growth Economics                    |

| No. | HistCite ID | Author(s)                                        | Title                                                                                                | Publication                                             | Year | LCS | Theme                                      |
|-----|-------------|--------------------------------------------------|------------------------------------------------------------------------------------------------------|---------------------------------------------------------|------|-----|--------------------------------------------|
| 31  | 506         | Huetting, R.                                     | Why environmental sustainability can most probably not be attained with growing production           | Journal of Cleaner Production                           | 2010 | 11  | Ecological Economics                       |
| 32  | 512         | van Griethuysen, P.                              | Why are we growth-addicted? The hard way towards degrowth in the involutory western development path | Journal of Cleaner Production                           | 2010 | 11  | Growth and Degrowth Economics              |
| 33  | 674         | Klitgaard, K. A. Krall, L.                       | Ecological economics, degrowth, and institutional change                                             | Ecological Economics                                    | 2012 | 11  | Growth and Degrowth Economics              |
| 34  | 5           | Ehrlich, P. R.                                   | Population Bomb                                                                                      | Book                                                    | 1968 | 10  | Historical Development of Growth Economics |
| 35  | 24          | Georgescu-Roegen, N.                             | Steady-state and ecological salvation - thermodynamic analysis                                       | Bioscience                                              | 1977 | 10  | Historical Development of Growth Economics |
| 36  | 74          | Smulders, S. Gradus, R.                          | Pollution abatement and long-term growth                                                             | European Journal of Political Economy                   | 1996 | 10  | 1990's Growth Economics                    |
| 37  | 643         | Cattaneo, C. D'alisa, G. Kallis, G. Zografos, C. | Degrowth futures and democracy introduction                                                          | Futures                                                 | 2012 | 10  | Political Economics                        |
| 38  | 3           | Carson, R.                                       | A Silent Spring                                                                                      | Book                                                    | 1962 | 9   | Historical Development of Growth Economics |
| 39  | 7           | Ehrlich, P. R. Holdren, J. P.                    | Impact of population growth                                                                          | Science                                                 | 1971 | 9   | Historical Development of Growth Economics |
| 40  | 8           | Daly, H. E.                                      | In defense of a steady-state economy                                                                 | American Journal of Agricultural Economics              | 1972 | 9   | Historical Development of Growth Economics |
| 41  | 17          | Dasgupta, P. Heal, G.                            | The optimal depletion of exhaustible resources                                                       | Review Economic Studies                                 | 1974 | 9   | Historical Development of Growth Economics |
| 42  | 304         | Røpke, I.                                        | Trends in the development of ecological economics from the late 1980s to the early 2000s             | Ecological Economics                                    | 2005 | 9   | Ecological Economics                       |
| 43  | 393         | Turner, G. M.                                    | A comparison of the limits to growth with 30 years of reality                                        | Global Environmental Change-Human and Policy Dimensions | 2008 | 9   | Ecological Economics                       |

| No. | HistCite ID | Author(s)                                           | Title                                                                                      | Publication                                       | Year | LCS | Theme                                      |
|-----|-------------|-----------------------------------------------------|--------------------------------------------------------------------------------------------|---------------------------------------------------|------|-----|--------------------------------------------|
| 44  | 439         | Kallis, G.<br>Martínez-Alier, J.<br>Norgaard, R. B. | Paper assets, real debts: an ecological-economic exploration of the global economic crisis | Critical Perspectives on International Business   | 2009 | 9   | Ecological Economics                       |
| 45  | 675         | Blauwhof, F. B.                                     | Overcoming accumulation: is a capitalist steady-state economy possible?                    | Ecological Economics                              | 2012 | 9   | Growth and Degrowth Economics              |
| 46  | 23          | Georgescu-Roegen, N.                                | Energy and economic myths                                                                  | Southern Economic Journal                         | 1975 | 8   | Historical Development of Growth Economics |
| 47  | 46          | De Long, J. B.<br>Summers, L.H.                     | Equipment investment and economic-growth                                                   | Quarterly Journal of Economics                    | 1991 | 8   | 1990's Growth Economics                    |
| 48  | 97          | Elbasha, E. H.<br>Roe, T. L.                        | On endogenous growth: the implications of environmental externalities                      | Journal of Environmental Economics and Management | 1996 | 8   | 1990's Growth Economics                    |
| 49  | 104         | Bovenberg, A. L.<br>Smulders, S. A.                 | Transitional impacts of environmental policy in an endogenous growth model                 | International Economic Review                     | 1996 | 8   | 1990's Growth Economics                    |
| 50  | 240         | Hamilton, C.                                        | Growth Fetish                                                                              | Book                                              | 2003 | 8   | Growth and Degrowth Economics              |
| 51  | 495         | Smith, R.                                           | Beyond growth or beyond capitalism?                                                        | Real World Economics Review                       | 2010 | 8   | Growth and Degrowth Economics              |
| 52  | 507         | van den Bergh, J. C. J. M.                          | Relax about GDP growth: implications for climate and crisis policies                       | Journal of Cleaner Production                     | 2010 | 8   | Growth and Degrowth Economics              |
| 53  | 510         | Matthey, A.                                         | Less is more: the influence of aspirations and priming on well-being                       | Journal of Cleaner Production                     | 2010 | 8   | Growth and Degrowth Economics              |
| 54  | 556         | Lawn, P.                                            | Is steady-state capitalism viable? A review of the issues and an answer in the affirmative | Ecological Economics Reviews                      | 2011 | 8   | Growth and Degrowth Economics              |
| 55  | 608         | Martínez-Alier, J                                   | Environmental justice and economic degrowth: an alliance between two movements             | Capitalism Nature Socialism                       | 2012 | 8   | Political Economics                        |
| 56  | 671         | Victor, P. A                                        | Growth, degrowth and climate change: a scenario analysis                                   | Ecological Economics                              | 2012 | 8   | Growth and Degrowth Economics              |
| 57  | 710         | Muraca, B.                                          | Décroissance: a project for a radical transformation of society                            | Environmental Values                              | 2013 | 8   | Political Economics                        |

Note: sorted by  $LCS \geq 8$

## Appendix 3

Supplemental Figure 1: Bibliographic map of the 57 most highly cited publications

Grey: Historical Development of Growth Economics; Orange: 1990s Growth Economics; Green: Ecological Economics; Purple: Political Economics; Blue: Growth and Degrowth Economics.

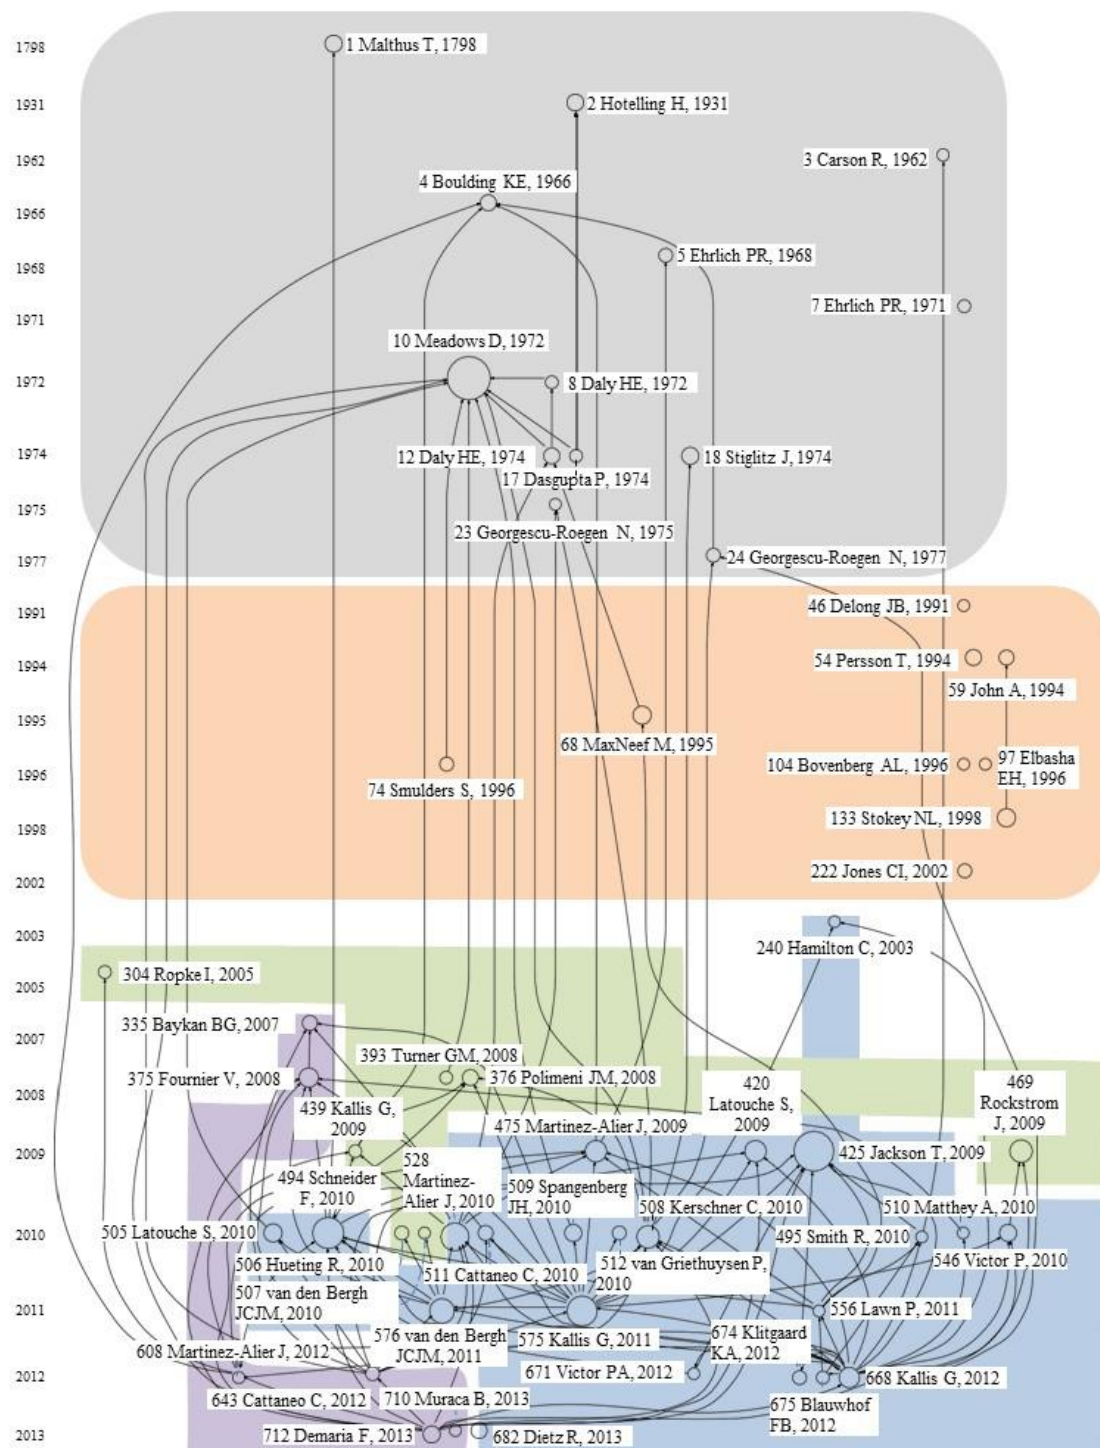

Supplement: Supplementary file 1 [file 17797529]
